# Supplementary material for: Design of a care pathway for pharmacy-based PrEP delivery in Kenya: results from a collaborative stakeholder consultation
Source: PubMed Central journal article supplement (PMC7661206; doi:10.1186/s12913-020-05898-9), 2020-11-12

## Appendix IV. Pharmacy PrEP prescribing Checklist

Pharmacy: \_\_\_\_\_ Provider: \_\_\_\_\_ Qualifications: \_\_\_\_\_ MFL code: \_\_\_\_\_

|                                                                                                                                                                                                                                                                                                                                                                                                                                                                                                                                                                                                                                                                                                                                                                                                    |                                                                                                                                                                                            |                                                                                                                                                                                                      |
|----------------------------------------------------------------------------------------------------------------------------------------------------------------------------------------------------------------------------------------------------------------------------------------------------------------------------------------------------------------------------------------------------------------------------------------------------------------------------------------------------------------------------------------------------------------------------------------------------------------------------------------------------------------------------------------------------------------------------------------------------------------------------------------------------|--------------------------------------------------------------------------------------------------------------------------------------------------------------------------------------------|------------------------------------------------------------------------------------------------------------------------------------------------------------------------------------------------------|
| <b>CLIENT PROFILE:</b><br>Unique client record number: _____ / _____ / _____                                                                                                                                                                                                                                                                                                                                                                                                                                                                                                                                                                                                                                                                                                                       |                                                                                                                                                                                            | Visit date: <i>dd / mm / yyyy</i><br>Initiating PrEP: <input type="checkbox"/> Yes <input type="checkbox"/> No                                                                                       |
| Name: First _____ Middle _____ Last _____ Telephone no: _____<br>Alien/National ID/passport/Birth Cert No: _____ Came to pharmacy for: _____                                                                                                                                                                                                                                                                                                                                                                                                                                                                                                                                                                                                                                                       |                                                                                                                                                                                            |                                                                                                                                                                                                      |
| <b>PrEP initiation ONLY:</b><br>Sex: <input type="checkbox"/> Male <input type="checkbox"/> Female Date of birth: <i>dd / mm / yyyy</i> Age (years): _____ If age <19, attends school: <input type="checkbox"/> Yes <input type="checkbox"/> No<br>Marital status: <input type="checkbox"/> Never married <input type="checkbox"/> Cohabiting <input type="checkbox"/> Married monogamous <input type="checkbox"/> Married polygamous <input type="checkbox"/> Separated/divorced <input type="checkbox"/> Widowed<br>Population type: <input type="checkbox"/> Gen Population <input type="checkbox"/> Discordant couple <input type="checkbox"/> Key Population (Specify) → <input type="checkbox"/> MSM <input type="checkbox"/> MSW <input type="checkbox"/> FSW <input type="checkbox"/> PWID |                                                                                                                                                                                            |                                                                                                                                                                                                      |
| [If transferred in:] PrEP start date: <i>dd / mm / yyyy</i> Regimen: <input type="checkbox"/> TDF-FTC <input type="checkbox"/> TDF <input type="checkbox"/> TDF-3TC<br>Facility transferred from: _____ MFL code: _____ County: _____                                                                                                                                                                                                                                                                                                                                                                                                                                                                                                                                                              |                                                                                                                                                                                            |                                                                                                                                                                                                      |
| <b>PrEP SCREENING:</b>                                                                                                                                                                                                                                                                                                                                                                                                                                                                                                                                                                                                                                                                                                                                                                             |                                                                                                                                                                                            |                                                                                                                                                                                                      |
| <b>Behavioral risk assessment: Mark all that apply (past 6 months)</b>                                                                                                                                                                                                                                                                                                                                                                                                                                                                                                                                                                                                                                                                                                                             |                                                                                                                                                                                            |                                                                                                                                                                                                      |
| Sex partner(s) is HIV+ AND:<br><i>not on ART, or On ART &lt;6 months, or suspected poor ART adherence, or detectable viral load, or couple trying to conceive</i>                                                                                                                                                                                                                                                                                                                                                                                                                                                                                                                                                                                                                                  | <input type="checkbox"/> Yes <input type="checkbox"/> No                                                                                                                                   | <div style="border: 1px solid black; border-radius: 15px; padding: 10px; background-color: #f0f0f0;"> <p><b>At HIV risk;</b><br/> <b><u>CONTINUE</u> with PrEP initiation at pharmacy</b></p> </div> |
| Sex partner(s) high risk & HIV status is unknown:                                                                                                                                                                                                                                                                                                                                                                                                                                                                                                                                                                                                                                                                                                                                                  | <input type="checkbox"/> Yes <input type="checkbox"/> No                                                                                                                                   |                                                                                                                                                                                                      |
| Has sex with >1 partner                                                                                                                                                                                                                                                                                                                                                                                                                                                                                                                                                                                                                                                                                                                                                                            | <input type="checkbox"/> Yes <input type="checkbox"/> No                                                                                                                                   |                                                                                                                                                                                                      |
| Ongoing IPV/GBV                                                                                                                                                                                                                                                                                                                                                                                                                                                                                                                                                                                                                                                                                                                                                                                    | <input type="checkbox"/> Yes <input type="checkbox"/> No                                                                                                                                   |                                                                                                                                                                                                      |
| Transactional sex                                                                                                                                                                                                                                                                                                                                                                                                                                                                                                                                                                                                                                                                                                                                                                                  | <input type="checkbox"/> Yes <input type="checkbox"/> No                                                                                                                                   |                                                                                                                                                                                                      |
| Recent STI (past 6 months)                                                                                                                                                                                                                                                                                                                                                                                                                                                                                                                                                                                                                                                                                                                                                                         | <input type="checkbox"/> Yes <input type="checkbox"/> No                                                                                                                                   |                                                                                                                                                                                                      |
| Recurrent use of post-exposure prophylaxis (PEP)                                                                                                                                                                                                                                                                                                                                                                                                                                                                                                                                                                                                                                                                                                                                                   | <input type="checkbox"/> Yes <input type="checkbox"/> No                                                                                                                                   |                                                                                                                                                                                                      |
| Recurrent sex under influence of alcohol/recreational drugs                                                                                                                                                                                                                                                                                                                                                                                                                                                                                                                                                                                                                                                                                                                                        | <input type="checkbox"/> Yes <input type="checkbox"/> No                                                                                                                                   |                                                                                                                                                                                                      |
| Inconsistent or no condom use                                                                                                                                                                                                                                                                                                                                                                                                                                                                                                                                                                                                                                                                                                                                                                      | <input type="checkbox"/> Yes <input type="checkbox"/> No                                                                                                                                   |                                                                                                                                                                                                      |
| Injection drug use with shared needles and/or syringes                                                                                                                                                                                                                                                                                                                                                                                                                                                                                                                                                                                                                                                                                                                                             | <input type="checkbox"/> Yes <input type="checkbox"/> No                                                                                                                                   |                                                                                                                                                                                                      |
| <b>Counseling</b>                                                                                                                                                                                                                                                                                                                                                                                                                                                                                                                                                                                                                                                                                                                                                                                  |                                                                                                                                                                                            |                                                                                                                                                                                                      |
| Willing to start/continue PrEP:                                                                                                                                                                                                                                                                                                                                                                                                                                                                                                                                                                                                                                                                                                                                                                    | <input type="checkbox"/> Yes <input type="checkbox"/> No                                                                                                                                   | <div style="border: 1px solid black; border-radius: 15px; padding: 10px; background-color: #f0f0f0;"> <p><b><u>CONTINUE</u> with PrEP initiation at pharmacy</b></p> </div>                          |
| Adherence counseling Done:                                                                                                                                                                                                                                                                                                                                                                                                                                                                                                                                                                                                                                                                                                                                                                         | <input type="checkbox"/> Yes <input type="checkbox"/> No                                                                                                                                   |                                                                                                                                                                                                      |
| Side effect counseling Done:                                                                                                                                                                                                                                                                                                                                                                                                                                                                                                                                                                                                                                                                                                                                                                       | <input type="checkbox"/> Yes <input type="checkbox"/> No                                                                                                                                   |                                                                                                                                                                                                      |
| Family planning counseling Done:                                                                                                                                                                                                                                                                                                                                                                                                                                                                                                                                                                                                                                                                                                                                                                   | <input type="checkbox"/> Yes <input type="checkbox"/> No                                                                                                                                   |                                                                                                                                                                                                      |
| <b>Medical safety assessment</b>                                                                                                                                                                                                                                                                                                                                                                                                                                                                                                                                                                                                                                                                                                                                                                   |                                                                                                                                                                                            |                                                                                                                                                                                                      |
| Signs & symptoms of acute HIV Infection:                                                                                                                                                                                                                                                                                                                                                                                                                                                                                                                                                                                                                                                                                                                                                           | <input type="checkbox"/> Yes <input type="checkbox"/> No                                                                                                                                   | <div style="border: 1px solid black; border-radius: 15px; padding: 10px; background-color: #f0f0f0;"> <p><b><u>DO NOT</u> start PrEP;</b><br/> <b>refer to remote clinician</b></p> </div>           |
| Signs & symptoms of COVID-19 infection:                                                                                                                                                                                                                                                                                                                                                                                                                                                                                                                                                                                                                                                                                                                                                            | <input type="checkbox"/> Yes <input type="checkbox"/> No                                                                                                                                   |                                                                                                                                                                                                      |
| Liver disease:                                                                                                                                                                                                                                                                                                                                                                                                                                                                                                                                                                                                                                                                                                                                                                                     | <input type="checkbox"/> Yes <input type="checkbox"/> No                                                                                                                                   |                                                                                                                                                                                                      |
| Kidney disease:                                                                                                                                                                                                                                                                                                                                                                                                                                                                                                                                                                                                                                                                                                                                                                                    | <input type="checkbox"/> Yes <input type="checkbox"/> No                                                                                                                                   |                                                                                                                                                                                                      |
| Diabetes:                                                                                                                                                                                                                                                                                                                                                                                                                                                                                                                                                                                                                                                                                                                                                                                          | <input type="checkbox"/> Yes <input type="checkbox"/> No                                                                                                                                   |                                                                                                                                                                                                      |
| Other: _____                                                                                                                                                                                                                                                                                                                                                                                                                                                                                                                                                                                                                                                                                                                                                                                       | <input type="checkbox"/> Yes <input type="checkbox"/> No                                                                                                                                   |                                                                                                                                                                                                      |
| [If female:] <input type="checkbox"/> Pregnant or <input type="checkbox"/> Breastfeeding:                                                                                                                                                                                                                                                                                                                                                                                                                                                                                                                                                                                                                                                                                                          | <input type="checkbox"/> Yes <input type="checkbox"/> No                                                                                                                                   |                                                                                                                                                                                                      |
| <b>PrEP refills ONLY:</b>                                                                                                                                                                                                                                                                                                                                                                                                                                                                                                                                                                                                                                                                                                                                                                          |                                                                                                                                                                                            |                                                                                                                                                                                                      |
| Reported PrEP side effects: Describe: _____                                                                                                                                                                                                                                                                                                                                                                                                                                                                                                                                                                                                                                                                                                                                                        | <input type="checkbox"/> Yes <input type="checkbox"/> No                                                                                                                                   | <div style="border: 1px solid black; border-radius: 15px; padding: 10px; background-color: #f0f0f0;"> <p><b><u>DO NOT</u> start PrEP;</b><br/> <b>refer to remote clinician</b></p> </div>           |
| [if yes:] Side effects severe: _____                                                                                                                                                                                                                                                                                                                                                                                                                                                                                                                                                                                                                                                                                                                                                               | <input type="checkbox"/> Yes <input type="checkbox"/> No                                                                                                                                   |                                                                                                                                                                                                      |
| <b>HIV testing</b>                                                                                                                                                                                                                                                                                                                                                                                                                                                                                                                                                                                                                                                                                                                                                                                 |                                                                                                                                                                                            |                                                                                                                                                                                                      |
| HIV test result: <input type="checkbox"/> Negative <input type="checkbox"/> Positive <input type="checkbox"/> Indeterminate [Retest]                                                                                                                                                                                                                                                                                                                                                                                                                                                                                                                                                                                                                                                               | <div style="border: 1px solid black; border-radius: 15px; padding: 10px; background-color: #f0f0f0;"> <p><b><u>DO NOT</u> start PrEP;</b><br/> <b>refer to remote clinician</b></p> </div> |                                                                                                                                                                                                      |
| [If retest:] HIV test result: <input type="checkbox"/> Negative <input type="checkbox"/> Positive <input type="checkbox"/> Indeterminate                                                                                                                                                                                                                                                                                                                                                                                                                                                                                                                                                                                                                                                           |                                                                                                                                                                                            |                                                                                                                                                                                                      |
| <b>PrEP DISPENSING:</b>                                                                                                                                                                                                                                                                                                                                                                                                                                                                                                                                                                                                                                                                                                                                                                            |                                                                                                                                                                                            |                                                                                                                                                                                                      |
| Regimen: <input type="checkbox"/> TDF-FTC <input type="checkbox"/> TDF <input type="checkbox"/> TDF-3TC<br># of months prescribed: _____                                                                                                                                                                                                                                                                                                                                                                                                                                                                                                                                                                                                                                                           | Next appointment date: <i>dd / mm / yyyy</i>                                                                                                                                               |                                                                                                                                                                                                      |
| Date of initiation: <i>dd / mm / yyyy</i>                                                                                                                                                                                                                                                                                                                                                                                                                                                                                                                                                                                                                                                                                                                                                          | Provider initials: _____                                                                                                                                                                   |                                                                                                                                                                                                      |

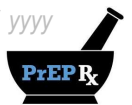

Supplement: 12913_2020_5898_MOESM4_ESM.pdf [file 12913_2020_5898_MOESM4_ESM.pdf]
