# Supplementary material for: Design of a care pathway for pharmacy-based PrEP delivery in Kenya: results from a collaborative stakeholder consultation
Source: PubMed Central journal article supplement (PMC7661206; doi:10.1186/s12913-020-05898-9), 2020-11-12
Supplement: 12913_2020_5898_MOESM1_ESM.pdf [file 12913_2020_5898_MOESM1_ESM.pdf]

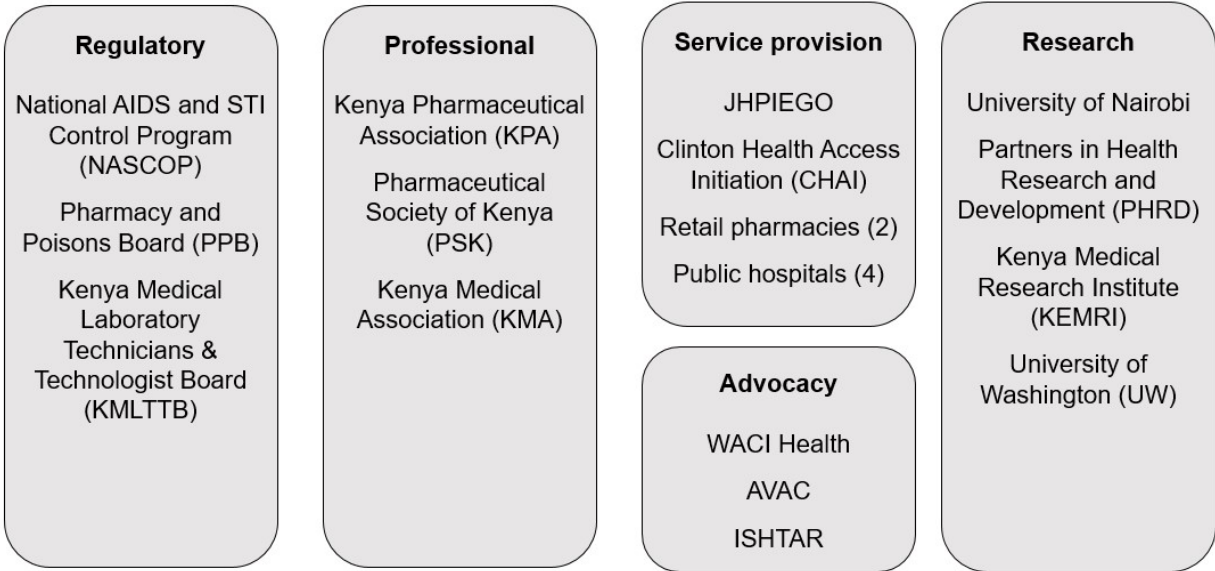

**Appendix I. Stakeholder organizations in attendance at the January 2020 meeting**

The retail pharmacies in attendance included Huruma Pharmacy and Leleshwa Pharmacy. The hospitals in attendance included Thika Level 5 Hospital, Mbagathi Hospital, Ruiru Hospital, and Karatina Hospital.
