# Supplementary material for: Design of a care pathway for pharmacy-based PrEP delivery in Kenya: results from a collaborative stakeholder consultation
Source: PubMed Central journal article supplement (PMC7661206; doi:10.1186/s12913-020-05898-9), 2020-11-12
Supplement: 12913_2020_5898_MOESM3_ESM.pdf [file 12913_2020_5898_MOESM3_ESM.pdf]

**Appendix III: Pharmacy-based PrEP delivery – Worksheet #2**

| <b>Core component</b>                                                                                                                     | <b>Part 2: Solutions &amp; regulatory</b> |                                  |
|-------------------------------------------------------------------------------------------------------------------------------------------|-------------------------------------------|----------------------------------|
|                                                                                                                                           | <i>Potential solutions</i>                | <i>Regulatory considerations</i> |
| <b>(Promotional materials)</b><br><i>Targeting HIV at-risk individuals (e.g., posters, pharmacy provider recommendation)</i>              |                                           |                                  |
| <b>Counseling</b><br><i>e.g., HIV risk reduction, importance of PrEP adherence, potential PrEP side effects, other?</i>                   |                                           |                                  |
| <b>HIV testing</b><br><i>Prior to PrEP initiation and refill (includes counseling). Location of testing? Rapid HIV test or self-test?</i> |                                           |                                  |
| <b>Prescribing</b><br><i>Written once clinical safety determined &amp; checklist completed. Who? Records?</i>                             |                                           |                                  |
| <b>Dispensing</b><br><i>After side effect assessment completed and everything on checklist ticked. Records?</i>                           |                                           |                                  |
| <b>Oversight/Referrals</b><br><i>Includes remote clinician oversight; clinic referral; record keeping; reporting; etc.</i>                |                                           |                                  |
